# Supplementary material for: Assessing Phenological Shifts of Deciduous Forests in Turkey under Climate Change: An Assessment for Fagus orientalis with Daily MODIS Data for 19 Years
Source: MDPI journal article supplement (doi:10.3390/f14020413), 2023-02-17
Supplement: s1 [file s1]

**Table S1. Assessed climate variables over the study period (2002-2020)**

| Variable                        | p.Val.with.Time | p.Val.with.SOS | Corr.Coeff. | Case  |
|---------------------------------|-----------------|----------------|-------------|-------|
| CH T <sub>base</sub> = 7.2 FM   | 0.0424**        | 0.0045***      | 0,6211      | Case1 |
| GDD T <sub>base</sub> = 2 FM    | 0.0358**        | 0.0045***      | -0,621      | Case1 |
| GDD T <sub>base</sub> = 2 JFM   | 0.0358**        | 0.0056***      | -0,6095     | Case1 |
| CH T <sub>base</sub> = 7.2 JFM  | 0.0358**        | 0.006***       | 0,6059      | Case1 |
| GDD T <sub>base</sub> = 1 FM    | 0.0252**        | 0.006***       | -0,6055     | Case1 |
| GDD T <sub>base</sub> = 1 JFM   | 0.0252**        | 0.0078***      | -0,5902     | Case1 |
| GDD T <sub>base</sub> = 0 FM    | 0.0143**        | 0.0079***      | -0,5898     | Case1 |
| GDD T <sub>base</sub> = 0 JFM   | 0.0252**        | 0.0107**       | -0,5708     | Case1 |
| CH T <sub>base</sub> = 7.2 DJFM | 0.0424**        | 0.0316**       | 0,4939      | Case1 |
| T <sub>mean</sub> A             | 0.0209**        | 0.0419**       | -0,4707     | Case1 |
| GDD T <sub>base</sub> = 5 JFMA  | 0.1617          | 0.0001***      | -0,7892     | Case2 |
| GDD T <sub>base</sub> = 4 JFMA  | 0.1237          | 0.0001***      | -0,7888     | Case2 |
| GDD T <sub>base</sub> = 6 JFMA  | 0.2939          | 0.0001***      | -0,7854     | Case2 |
| GDD T <sub>base</sub> = 4 FMA   | 0.1417          | 0.0001***      | -0,7846     | Case2 |
| GDD T <sub>base</sub> = 3 MA    | 0.1617          | 0.0001***      | -0,7844     | Case2 |
| GDD T <sub>base</sub> = 4 MA    | 0.1837          | 0.0001***      | -0,7835     | Case2 |
| GDD T <sub>base</sub> = 5 FMA   | 0.2342          | 0.0001***      | -0,7832     | Case2 |
| GDD T <sub>base</sub> = 3 JFMA  | 0.0931          | 0.0001***      | -0,7825     | Case2 |
| GDD T <sub>base</sub> = 2 MA    | 0.1417          | 0.0001***      | -0,7824     | Case2 |
| GDD T <sub>base</sub> = 3 FMA   | 0.1237          | 0.0001***      | -0,7809     | Case2 |
| GDD T <sub>base</sub> = 5 MA    | 0.1837          | 0.0001***      | -0,7803     | Case2 |
| GDD T <sub>base</sub> = 6 FMA   | 0.2939          | 0.0001***      | -0,7788     | Case2 |
| GDD T <sub>base</sub> = 1 MA    | 0.1417          | 0.0001***      | -0,7782     | Case2 |
| GDD T <sub>base</sub> = 7 JFMA  | 0.2939          | 0.0001***      | -0,7779     | Case2 |
| GDD T <sub>base</sub> = 6 MA    | 0.2079          | 0.0001***      | -0,7756     | Case2 |
| GDD T <sub>base</sub> = 0 MA    | 0.1837          | 0.0001***      | -0,7737     | Case2 |
| GDD T <sub>base</sub> = 2 FMA   | 0.0931          | 0.0001***      | -0,7728     | Case2 |
| GDD T <sub>base</sub> = 7 FMA   | 0.3273          | 0.0001***      | -0,7717     | Case2 |
| GDD T <sub>base</sub> = 2 JFMA  | 0.0689          | 0.0001***      | -0,7714     | Case2 |
| GDD T <sub>base</sub> = 8 JFMA  | 0.2342          | 0.0001***      | -0,7687     | Case2 |
| GDD T <sub>base</sub> = 7 MA    | 0.1837          | 0.0001***      | -0,7685     | Case2 |
| GDD T <sub>base</sub> = 8 FMA   | 0.2939          | 0.0001***      | -0,7632     | Case2 |
| GDD T <sub>base</sub> = 1 FMA   | 0.0802          | 0.0002***      | -0,7615     | Case2 |
| GDD T <sub>base</sub> = 8 MA    | 0.2342          | 0.0002***      | -0,7604     | Case2 |
| GDD T <sub>base</sub> = 1 JFMA  | 0.0589          | 0.0002***      | -0,7565     | Case2 |
| GDD T <sub>base</sub> = 0 FMA   | 0.0501          | 0.0002***      | -0,7491     | Case2 |

|                                |        |           |         |       |
|--------------------------------|--------|-----------|---------|-------|
| GDD T <sub>base</sub> = 0 JFMA | 0.0501 | 0.0003*** | -0,7404 | Case2 |
| GDD T <sub>base</sub> = 0 A    | 0.2342 | 0.0004*** | -0,7259 | Case2 |
| GDD T <sub>base</sub> = 1 A    | 0.2342 | 0.0005*** | -0,7236 | Case2 |
| GDD T <sub>base</sub> = 2 A    | 0.2629 | 0.0005*** | -0,7203 | Case2 |
| GDD T <sub>base</sub> = 3 A    | 0.3273 | 0.0006*** | -0,7161 | Case2 |
| GDD T <sub>base</sub> = 4 A    | 0.3273 | 0.0006*** | -0,7112 | Case2 |
| GDD T <sub>base</sub> = 5 A    | 0.363  | 0.0007*** | -0,7075 | Case2 |
| GDD T <sub>base</sub> = 6 A    | 0.4011 | 0.0007*** | -0,7056 | Case2 |
| GDD T <sub>base</sub> = 8 A    | 0.3273 | 0.0007*** | -0,7052 | Case2 |
| GDD T <sub>base</sub> = 7 A    | 0.4011 | 0.0008*** | -0,7048 | Case2 |
| CH T <sub>base</sub> = 7.2 M   | 0.0931 | 0.0028*** | 0,6461  | Case2 |
| GDD T <sub>base</sub> = 5 FM   | 0.0931 | 0.0028*** | -0,6457 | Case2 |
| GDD T <sub>base</sub> = 4 FM   | 0.0689 | 0.003***  | -0,6431 | Case2 |
| GDD T <sub>base</sub> = 6 FM   | 0.1417 | 0.003***  | -0,6431 | Case2 |
| GDD T <sub>base</sub> = 5 JFM  | 0.0931 | 0.0031*** | -0,6407 | Case2 |
| GDD T <sub>base</sub> = 6 JFM  | 0.0931 | 0.0032*** | -0,64   | Case2 |
| GDD T <sub>base</sub> = 4 JFM  | 0.1075 | 0.0034*** | -0,6358 | Case2 |
| GDD T <sub>base</sub> = 3 FM   | 0.0589 | 0.0035*** | -0,6343 | Case2 |
| GDD T <sub>base</sub> = 7 FM   | 0.2079 | 0.0036*** | -0,634  | Case2 |
| GDD T <sub>base</sub> = 7 JFM  | 0.1237 | 0.0037*** | -0,6321 | Case2 |
| GDD T <sub>base</sub> = 6 M    | 0.1837 | 0.0037*** | -0,6318 | Case2 |
| GDD T <sub>base</sub> = 5 M    | 0.1837 | 0.0037*** | -0,6318 | Case2 |
| GDD T <sub>base</sub> = 4 M    | 0.1237 | 0.004***  | -0,6273 | Case2 |
| GDD T <sub>base</sub> = 3 JFM  | 0.0501 | 0.0042*** | -0,6249 | Case2 |
| GDD T <sub>base</sub> = 7 M    | 0.1837 | 0.0043*** | -0,6241 | Case2 |
| GDD T <sub>base</sub> = 8 FM   | 0.2629 | 0.0046*** | -0,6202 | Case2 |
| GDD T <sub>base</sub> = 3 M    | 0.1237 | 0.0047*** | -0,6197 | Case2 |
| GDD T <sub>base</sub> = 8 JFM  | 0.1417 | 0.0047*** | -0,6187 | Case2 |
| GDD T <sub>base</sub> = 8 M    | 0.2629 | 0.0056*** | -0,6099 | Case2 |
| GDD T <sub>base</sub> = 2 M    | 0.1075 | 0.0056*** | -0,6096 | Case2 |
| GDD T <sub>base</sub> = 1 M    | 0.0931 | 0.0069*** | -0,5973 | Case2 |
| GDD T <sub>base</sub> = 0 M    | 0.1075 | 0.0084*** | -0,5859 | Case2 |
| GDD T <sub>base</sub> = 3 F    | 0.1075 | 0.0387**  | -0,4774 | Case2 |
| GDD T <sub>base</sub> = 4 F    | 0.1617 | 0.0399**  | -0,4749 | Case2 |
| GDD T <sub>base</sub> = 2 F    | 0.0689 | 0.0414**  | -0,4719 | Case2 |
| GDD T <sub>base</sub> = 1 F    | 0.0931 | 0.0463**  | -0,4623 | Case2 |
| GDD T <sub>base</sub> = 5 F    | 0.1837 | 0.0476**  | -0,4598 | Case2 |

|                                    |           |        |         |       |
|------------------------------------|-----------|--------|---------|-------|
| GDD T <sub>base</sub> = 0 F        | 0.0802    | 0.0529 | -0,4505 | Case3 |
| T <sub>mean</sub> FMA              | 0.1237    | 0.0581 | -0,442  | Case3 |
| GDD T <sub>base</sub> = 6 F        | 0.2629    | 0.0616 | -0,4366 | Case3 |
| CH T <sub>base</sub> = 7.2 F       | 0.1617    | 0.076  | 0,4166  | Case3 |
| T <sub>mean</sub> MA               | 0.0041*** | 0.0799 | -0,4116 | Case3 |
| GDD T <sub>base</sub> = 7 F        | 0.2629    | 0.0818 | -0,4094 | Case3 |
| GDD T <sub>base</sub> = 8 DOY1-SOS | 0.7796    | 0.0934 | -0,3959 | Case3 |
| GDD T <sub>base</sub> = 7 DOY1-SOS | 0.9442    | 0.0936 | -0,3957 | Case3 |
| GDD T <sub>base</sub> = 6 DOY1-SOS | 1         | 0.0959 | -0,3931 | Case3 |
| GDD T <sub>base</sub> = 8 F        | 0.2939    | 0.1041 | -0,3844 | Case3 |
| GDD T <sub>base</sub> = 5 DOY1-SOS | 0.8887    | 0.1052 | -0,3834 | Case3 |
| GDD T <sub>base</sub> = 3 JF       | 0.2079    | 0.106  | -0,3826 | Case3 |
| GDD T <sub>base</sub> = 4 JF       | 0.2079    | 0.108  | -0,3805 | Case3 |
| GDD T <sub>base</sub> = 2 JF       | 0.2079    | 0.1106 | -0,378  | Case3 |
| T <sub>min</sub> A                 | 0.1417    | 0.1171 | -0,3717 | Case3 |
| GDD T <sub>base</sub> = 5 JF       | 0.2629    | 0.1185 | -0,3704 | Case3 |
| GDD T <sub>base</sub> = 1 JF       | 0.2079    | 0.122  | -0,3672 | Case3 |
| GDD T <sub>base</sub> = 4 DOY1-SOS | 1         | 0.1232 | -0,366  | Case3 |
| T <sub>min</sub> MA                | 0.0252**  | 0.1312 | -0,359  | Case3 |
| T <sub>max</sub> MA                | 0.0424**  | 0.1344 | -0,3563 | Case3 |
| GDD T <sub>base</sub> = 6 JF       | 0.3273    | 0.135  | -0,3557 | Case3 |
| GDD T <sub>base</sub> = 0 JF       | 0.1617    | 0.1359 | -0,3549 | Case3 |
| T <sub>max</sub> M                 | 0.1075    | 0.1426 | -0,3494 | Case3 |
| CH T <sub>base</sub> = 7.2 JF      | 0.363     | 0.1565 | 0,3383  | Case3 |
| GDD T <sub>base</sub> = 3 DOY1-SOS | 1         | 0.1586 | -0,3368 | Case3 |
| GDD T <sub>base</sub> = 7 JF       | 0.5756    | 0.159  | -0,3365 | Case3 |
| T <sub>max</sub> FMA               | 0.2939    | 0.1608 | -0,3351 | Case3 |
| GDD T <sub>base</sub> = 8 JF       | 0.4415    | 0.1844 | -0,3181 | Case3 |
| T <sub>max</sub> FM                | 0.7264    | 0.1926 | -0,3126 | Case3 |
| GDD T <sub>base</sub> = 2 DOY1-SOS | 0.7796    | 0.2183 | -0,2961 | Case3 |
| T <sub>mean</sub> JFMA             | 0.1075    | 0.2592 | -0,2724 | Case3 |
| GDD T <sub>base</sub> = 1 DOY1-SOS | 0.5756    | 0.3101 | -0,246  | Case3 |
| T <sub>mean</sub> FM               | 0.3273    | 0.3217 | -0,2403 | Case3 |
| T <sub>max</sub> JFMA              | 0.1417    | 0.3258 | -0,2383 | Case3 |
| CH T <sub>base</sub> = 7.2 DJF     | 0.0589    | 0.383  | 0,2122  | Case3 |
| T <sub>max</sub> JFM               | 0.4415    | 0.3886 | -0,2098 | Case3 |
| T <sub>max</sub> A                 | 0.0689    | 0.4133 | -0,1993 | Case3 |

|                                    |        |        |         |       |
|------------------------------------|--------|--------|---------|-------|
| GDD T <sub>base</sub> = 0 DOY1-SOS | 0.5756 | 0.4315 | -0,1918 | Case3 |
| T <sub>mean</sub> M                | 0.1837 | 0.4483 | -0,185  | Case3 |
| T <sub>mean</sub> F                | 0.6746 | 0.4661 | -0,1779 | Case3 |
| T <sub>min</sub> M                 | 0.0931 | 0.4797 | -0,1727 | Case3 |
| T <sub>min</sub> JF                | 0.5289 | 0.5148 | 0,1593  | Case3 |
| T <sub>min</sub> F                 | 0.5756 | 0.5617 | 0,1421  | Case3 |
| GDD T <sub>base</sub> = 2 J        | 0.8887 | 0.6518 | -0,1107 | Case3 |
| T <sub>min</sub> FMA               | 0.8887 | 0.6543 | -0,1099 | Case3 |
| GDD T <sub>base</sub> = 1 J        | 0.7264 | 0.6644 | -0,1065 | Case3 |
| T <sub>min</sub> J                 | 0.7796 | 0.6665 | 0,1058  | Case3 |
| GDD T <sub>base</sub> = 3 J        | 0.7796 | 0.669  | -0,1049 | Case3 |
| T <sub>mean</sub> JFM              | 0.363  | 0.6694 | -0,1048 | Case3 |
| CH T <sub>base</sub> = 7.2 D       | 0.363  | 0.6701 | -0,1046 | Case3 |
| GDD T <sub>base</sub> = 0 J        | 0.6746 | 0.6786 | -0,1017 | Case3 |
| CH T <sub>base</sub> = 7.2 J       | 0.6243 | 0.6881 | 0,0986  | Case3 |
| T <sub>mean</sub> J                | 0.8887 | 0.6954 | 0,0961  | Case3 |
| GDD T <sub>base</sub> = 4 J        | 0.8887 | 0.7061 | -0,0926 | Case3 |
| T <sub>min</sub> JFM               | 0.8887 | 0.7153 | 0,0896  | Case3 |
| GDD T <sub>base</sub> = 5 J        | 1      | 0.748  | -0,0789 | Case3 |
| GDD T <sub>base</sub> = 6 J        | 0.8887 | 0.7777 | -0,0694 | Case3 |
| T <sub>max</sub> JF                | 0.9442 | 0.7948 | -0,064  | Case3 |
| T <sub>max</sub> J                 | 0.8337 | 0.8062 | -0,0603 | Case3 |
| GDD T <sub>base</sub> = 7 J        | 1      | 0.8174 | -0,0568 | Case3 |
| T <sub>max</sub> F                 | 0.8887 | 0.8461 | -0,0477 | Case3 |
| GDD T <sub>base</sub> = 8 J        | 0.9442 | 0.8628 | -0,0425 | Case3 |
| CH T <sub>base</sub> = 7.2 DJ      | 0.3273 | 0.8903 | -0,0339 | Case3 |
| T <sub>min</sub> FM                | 0.6243 | 0.8917 | 0,0335  | Case3 |
| T <sub>mean</sub> JF               | 0.6746 | 0.9088 | -0,0282 | Case3 |
| T <sub>min</sub> JFMA              | 0.7264 | 0.9959 | 0,0012  | Case3 |

Case 1: Variable has a significant trend over the study period and significant correlation with mean SOS trend.

Case 2: Variable does not have a significant trend over the study period but has significant correlation with mean SOS trend.

Case 3: Variable has a significant trend over the study period but does not have a significant correlation with mean SOS trend.
